# Supplementary material for: Enhanced Chemical and Electrochemical Stability of Polyaniline-Based Layer-by-Layer Films
Source: MDPI journal article supplement (doi:10.3390/polym13172992), 2021-09-03
Supplement: s1 [file s1]

# Supporting Information

## Enhanced Chemical and Electrochemical Stability of Polyaniline-Based Layer-by-Layer Films

Putri Bintang Dea Firda <sup>1</sup>, Yoga Trianzar Malik <sup>1</sup>, Jun Kyun Oh <sup>2</sup>, Evan K. Wujcik <sup>3</sup>, and Ju-Won Jeon <sup>1\*</sup>,

<sup>1</sup> Department of Chemistry, Kookmin University, 77, Jeongneung-ro, Seongbuk-gu, Seoul 136-702, Republic of Korea

<sup>2</sup> Department of Polymer Science and Engineering, Dankook University, 152 Jukjeon-ro, Suji-gu, Yongin-si 16890, Gyeonggi-do, Republic of Korea

<sup>3</sup> Materials Engineering and Nanosensor [MEAN] Laboratory, Department of Chemical and Biological Engineering, The University of Alabama, Tuscaloosa, AL 35487, United States

\* Correspondence: jwjeon@kookmin.ac.kr

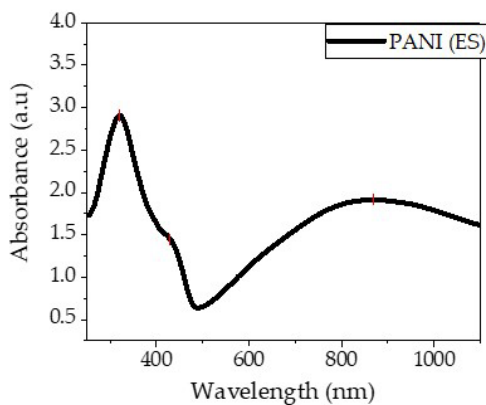

Figure S1. UV-vis spectra of emeraldine salt PANI

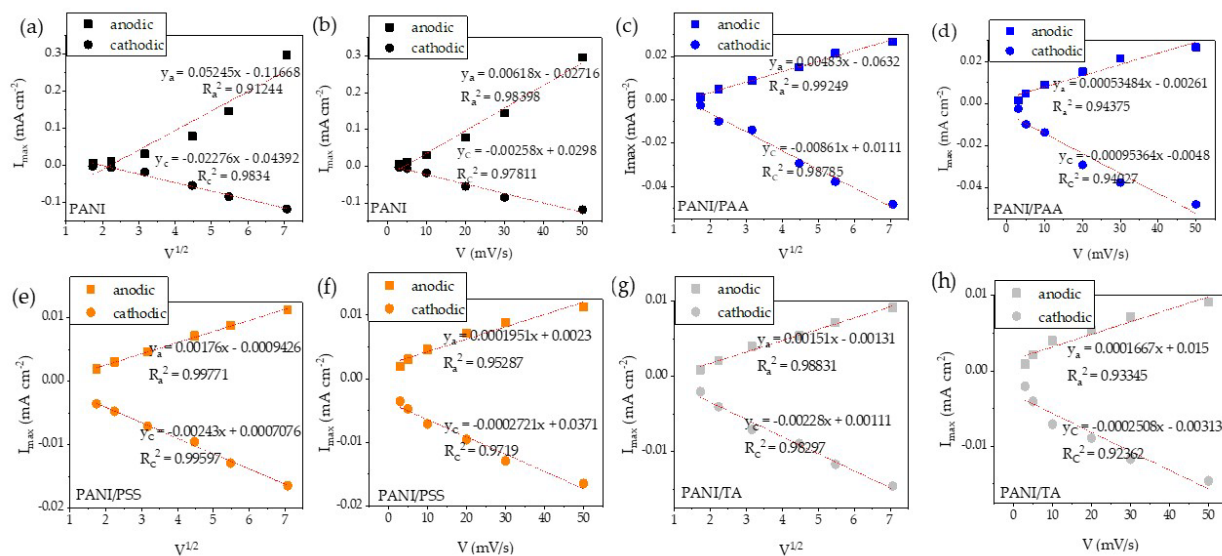

Figure S2. Plot of maximum current peak vs square root of scan rate, and maximum current peak vs scan rate of PANI (a, b); PANI/PAA (c, d); PANI/PSS (e, f), and PANI/TA (g, h) from Figure 7. a stands for anodic, c stands for cathodic.

Table S1a. Thickness data of the PANI/PAA sample

| Point   | thickness (nm) |        |        |        |        |
|---------|----------------|--------|--------|--------|--------|
|         | 5BL            | 10BL   | 20BL   | 30BL   | 40BL   |
| 1       | 38.3           | 83.8   | 134.76 | 174.47 | 280.58 |
| 2       | 45.7           | 75     | 164.9  | 186.27 | 282.73 |
| 3       | 32.85          | 65.8   | 179.5  | 184.54 | 279.39 |
| 4       | 37.05          | 72.9   | 138.44 | 158.32 | 299.41 |
| 5       | 43.75          | 68.3   | 132.6  | 187.57 | 287.87 |
| 6       | 41.9           | 70.7   | 130.23 | 185.82 | 291.9  |
| Average | 39.925         | 72.8   | 146.74 | 179.5  | 286.98 |
| StdDev  | 4.750658       | 6.3166 | 20.435 | 11.403 | 7.696  |

Table S1b. Roughness data of the PANI/PAA sample

| Point   | roughness (nm) |       |        |        |         |
|---------|----------------|-------|--------|--------|---------|
|         | 5BL            | 10BL  | 20BL   | 30BL   | 40BL    |
| 1       | 15.5           | 38    | 34.345 | 61.756 | 78.759  |
| 2       | 13.9           | 36.6  | 68.339 | 76.27  | 125.62  |
| 3       | 11             | 22.4  | 51.361 | 72.968 | 100.81  |
| 4       | 14             | 26.9  | 39.661 | 56.545 | 110.9   |
| 5       | 16.7           | 29.6  | 34.002 | 52.06  | 110.26  |
| 6       | 14.7           | 30    | 37.122 | 69.661 | 74.385  |
| Average | 14.3           | 30.6  | 44.138 | 64.877 | 100.122 |
| StdDev  | 1.923538       | 5.883 | 13.459 | 9.608  | 19.942  |

Table S1c. Thickness data of the PANI/PSS sample

| Parameter | thickness (nm) |        |        |          |          |
|-----------|----------------|--------|--------|----------|----------|
|           | 5BL            | 10BL   | 20BL   | 30BL     | 40BL     |
| 1         | 26.7           | 38.839 | 129.06 | 154.63   | 234.07   |
| 2         | 30.6           | 66.003 | 127.44 | 151.63   | 238.67   |
| 3         | 46.3           | 43.05  | 112.73 | 149.84   | 250.2    |
| 4         | 42.3           | 59.573 | 131.57 | 156.77   | 236.25   |
| 5         | 31.2           | 59.526 | 115.78 | 158.49   | 251.92   |
| 6         | 31.4           | 69.545 | 131.39 | 145.77   | 267.27   |
| Average   | 34.8           | 56.089 | 124.66 | 152.855  | 246.3967 |
| StdDev    | 7.697467       | 12.417 | 8.262  | 4.712094 | 12.61167 |

Table S1d. Roughness data of the PANI/PSS sample

| Parameter | roughness (nm) |        |        |          |          |
|-----------|----------------|--------|--------|----------|----------|
|           | 5BL            | 10BL   | 20BL   | 30BL     | 40BL     |
| 1         | 13.4           | 14.844 | 59.277 | 71.893   | 66.704   |
| 2         | 14.6           | 27.488 | 66.306 | 60.917   | 78.846   |
| 3         | 22.9           | 19.371 | 65.262 | 58.152   | 82.21    |
| 4         | 21.2           | 20.072 | 55.105 | 62.464   | 127.53   |
| 5         | 13.4           | 22.436 | 43.993 | 54.417   | 76.926   |
| 6         | 12.4           | 30.406 | 40.258 | 54.439   | 92.706   |
| Average   | 16.3           | 22.436 | 55.034 | 60.38033 | 87.487   |
| StdDev    | 4.5274         | 5.686  | 10.862 | 6.526828 | 21.33852 |

Table S1e. Thickness data of the PANI/TA sample

| Parameter | thickness (nm) |        |        |        |         |
|-----------|----------------|--------|--------|--------|---------|
|           | 5BL            | 10BL   | 20BL   | 30BL   | 40BL    |
| 1         | 12.5           | 20.6   | 35.3   | 55     | 130.4   |
| 2         | 17.4           | 24.5   | 28.2   | 51.2   | 105.9   |
| 3         | 11.3           | 16     | 50.5   | 52.2   | 99.2    |
| 4         | 17.9           | 21.1   | 39.5   | 48.4   | 108.7   |
| 5         | 16.1           | 24.2   | 44.2   | 67.8   | 124.6   |
| 6         | 18.5           | 14.4   | 46     | 56.6   | 127.7   |
| Average   | 15.6           | 20.1   | 40.6   | 55.2   | 116.1   |
| StdDev    | 3.0096         | 4.1645 | 8.0398 | 6.8118 | 13.0821 |

Table S1f. Roughness data of PANI/TA sample

| Point          | thickness (nm) |             |             |             |              |
|----------------|----------------|-------------|-------------|-------------|--------------|
|                | 5BL            | 10BL        | 20BL        | 30BL        | 40BL         |
| 1              | 12.5           | 20.6        | 35.3        | 55          | 130.4        |
| 2              | 17.4           | 24.5        | 28.2        | 51.2        | 105.9        |
| 3              | 11.3           | 16          | 50.5        | 52.2        | 99.2         |
| 4              | 17.9           | 21.1        | 39.5        | 48.4        | 108.7        |
| 5              | 16.1           | 24.2        | 44.2        | 67.8        | 124.6        |
| 6              | 18.5           | 14.4        | 46          | 56.6        | 127.7        |
| <b>Average</b> | <b>15.6</b>    | <b>20.1</b> | <b>40.6</b> | <b>55.2</b> | <b>116.1</b> |
| StdDev         | 3.0096         | 4.1645      | 8.0398      | 6.8118      | 13.0821      |

Table S2. Data for conductivity calculation in Figure 4 (c, d)

|                                     | PANI/PSS | PANI/PAA | PANI/TA  | PANI     |
|-------------------------------------|----------|----------|----------|----------|
| thickness (cm)                      | 1.53E-05 | 1.47E-05 | 1.16E-05 | 1.52E-05 |
| electrode length (cm)               | 1.643    | 1.556    | 1.797    | 1.783    |
| electrode distance (cm)             | 0.569    | 0.521    | 0.58     | 0.502    |
| R (Ohm)                             | 8.86E+06 | 1.73E+07 | 3.03E+07 | 5.73E+07 |
| Conductivity (mS cm <sup>-1</sup> ) | 2.55     | 1.32     | 0.92     | 0.323    |

Table S3. Data of areal capacitance from Figure 7, with scan rate of 50 mV s<sup>-1</sup> and voltage window of 1 V.

|              | PANI                                |                                          | PANI/PAA                            |                                          | PANI/PSS                            |                                          | PANI/TA                             |                                          |
|--------------|-------------------------------------|------------------------------------------|-------------------------------------|------------------------------------------|-------------------------------------|------------------------------------------|-------------------------------------|------------------------------------------|
| cycle number | Curve area (mA.V cm <sup>-2</sup> ) | Areal capacitance (mF cm <sup>-2</sup> ) | Curve area (mA.V cm <sup>-2</sup> ) | Areal capacitance (mF cm <sup>-2</sup> ) | Curve area (mA.V cm <sup>-2</sup> ) | Areal capacitance (mF cm <sup>-2</sup> ) | Curve area (mA.V cm <sup>-2</sup> ) | Areal capacitance (mF cm <sup>-2</sup> ) |
| 1            | 2.15E-01                            | 2.15E+00                                 | 2.20E-02                            | 2.20E-01                                 | 8.03E-03                            | 8.03E-02                                 | 5.59E-03                            | 5.59E-02                                 |
| 3            | 7.69E-02                            | 7.69E-01                                 | 2.07E-02                            | 2.07E-01                                 | 4.02E-03                            | 4.02E-02                                 | 3.11E-03                            | 3.11E-02                                 |
| 5            | 4.44E-02                            | 4.44E-01                                 | 1.93E-02                            | 1.93E-01                                 | 3.06E-03                            | 3.06E-02                                 | 2.49E-03                            | 2.49E-02                                 |
| 10           | 1.60E-02                            | 1.60E-01                                 | 1.64E-02                            | 1.64E-01                                 | 1.76E-03                            | 1.76E-02                                 | 1.79E-03                            | 1.79E-02                                 |
| 20           | 7.04E-03                            | 7.04E-02                                 | 1.24E-02                            | 1.24E-01                                 | 1.35E-03                            | 1.35E-02                                 | 1.18E-03                            | 1.18E-02                                 |
| 30           | 5.11E-03                            | 5.11E-02                                 | 9.82E-03                            | 9.82E-02                                 | 1.10E-03                            | 1.10E-02                                 | 8.81E-04                            | 8.81E-03                                 |
| 40           | 3.99E-03                            | 3.99E-02                                 | 7.99E-03                            | 7.99E-02                                 | 9.82E-04                            | 9.82E-03                                 | 7.47E-04                            | 7.47E-03                                 |
| 50           | 3.27E-03                            | 3.27E-02                                 | 6.80E-03                            | 6.80E-02                                 | 8.99E-04                            | 8.99E-03                                 | 6.37E-04                            | 6.37E-03                                 |
| 60           | 3.16E-03                            | 3.16E-02                                 | 5.90E-03                            | 5.90E-02                                 | 8.34E-04                            | 8.34E-03                                 | 5.68E-04                            | 5.68E-03                                 |
| 70           | 3.00E-03                            | 3.00E-02                                 | 5.09E-03                            | 5.09E-02                                 | 8.28E-04                            | 8.28E-03                                 | 5.18E-04                            | 5.18E-03                                 |
| 80           | 2.89E-03                            | 2.89E-02                                 | 4.61E-03                            | 4.61E-02                                 | 7.69E-04                            | 7.69E-03                                 | 4.78E-04                            | 4.78E-03                                 |
| 90           | 2.87E-03                            | 2.87E-02                                 | 4.26E-03                            | 4.26E-02                                 | 7.22E-04                            | 7.22E-03                                 | 4.49E-04                            | 4.49E-03                                 |
| 100          | 2.57E-03                            | 2.57E-02                                 | 3.85E-03                            | 3.85E-02                                 | 6.92E-04                            | 6.92E-03                                 | 4.33E-04                            | 4.33E-03                                 |
